# Supplementary material for: Hydrosilylation of aldehydes and ketones catalyzed by hydrido iron complexes bearing imine ligands
Source: Royal Society of Chemistry journal article supplement (doi:10.1039/c4dt00944d), 2014-06-04

## **Hydrosilylation of Aldehydes and Ketones Catalyzed by Hydrido Iron Complexes Bearing Imine Ligands**

Zhenyu Zuo, Hongjian Sun, Lin Wang and Xiaoyan Li\*

*School of Chemistry and Chemical Engineering, Key Laboratory of Special Functional Aggregated Materials, Ministry of Education, Shandong University, Shanda Nanlu 27, 250199 Jinan, PR China*

(1) NMR data of complexes **2** and **4**

(2) <sup>1</sup>HNMR data of the products of the catalytic reactions

(1) NMR data of t of complexes **2** and **4**

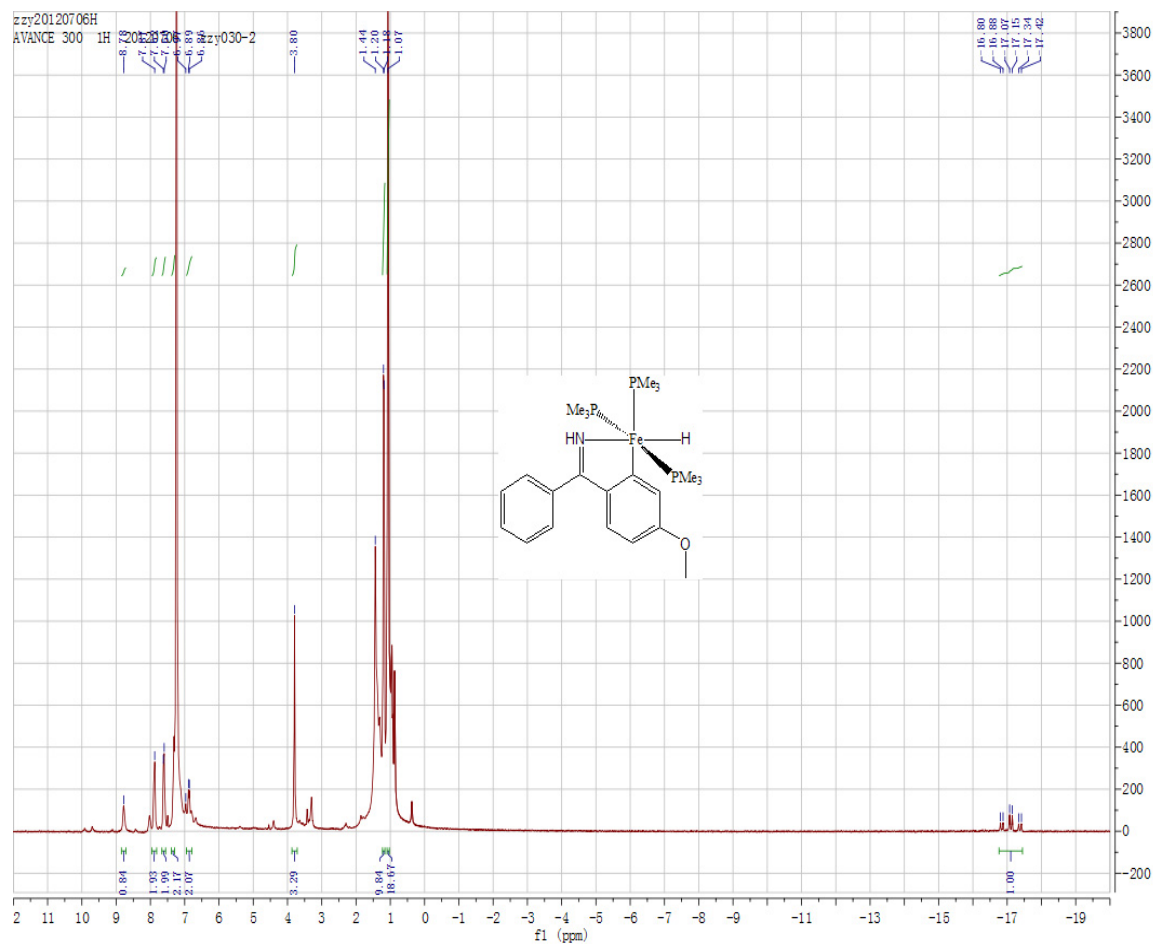

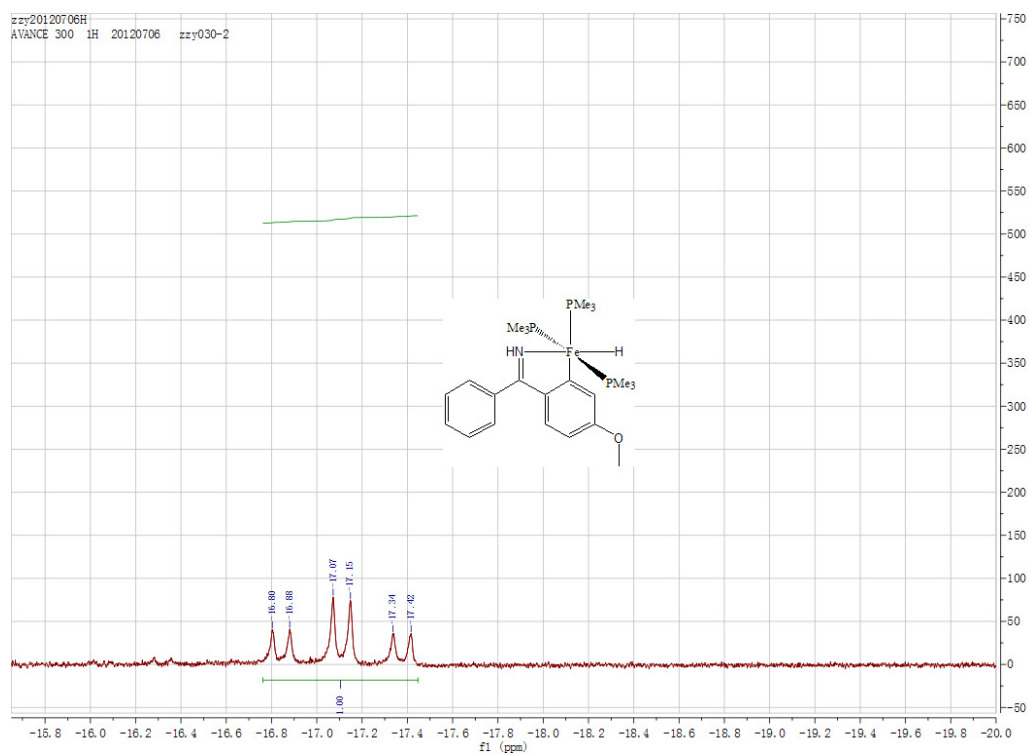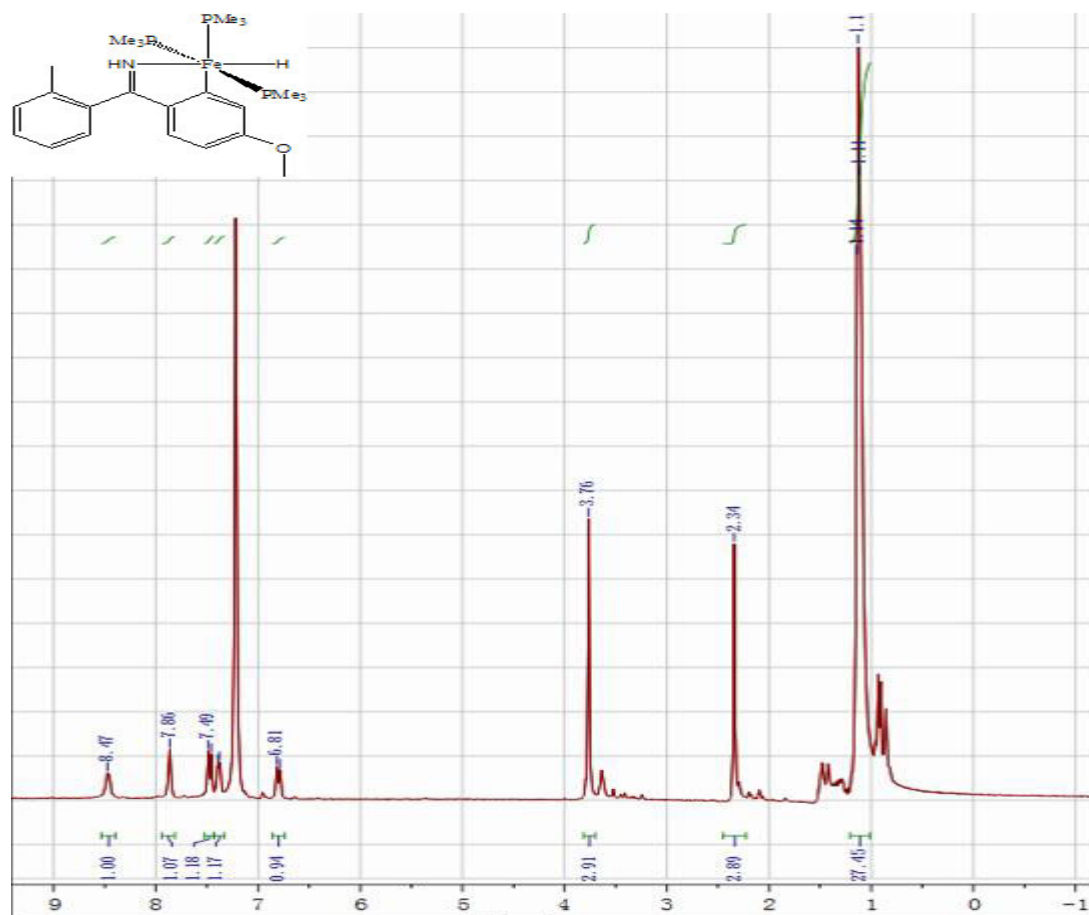



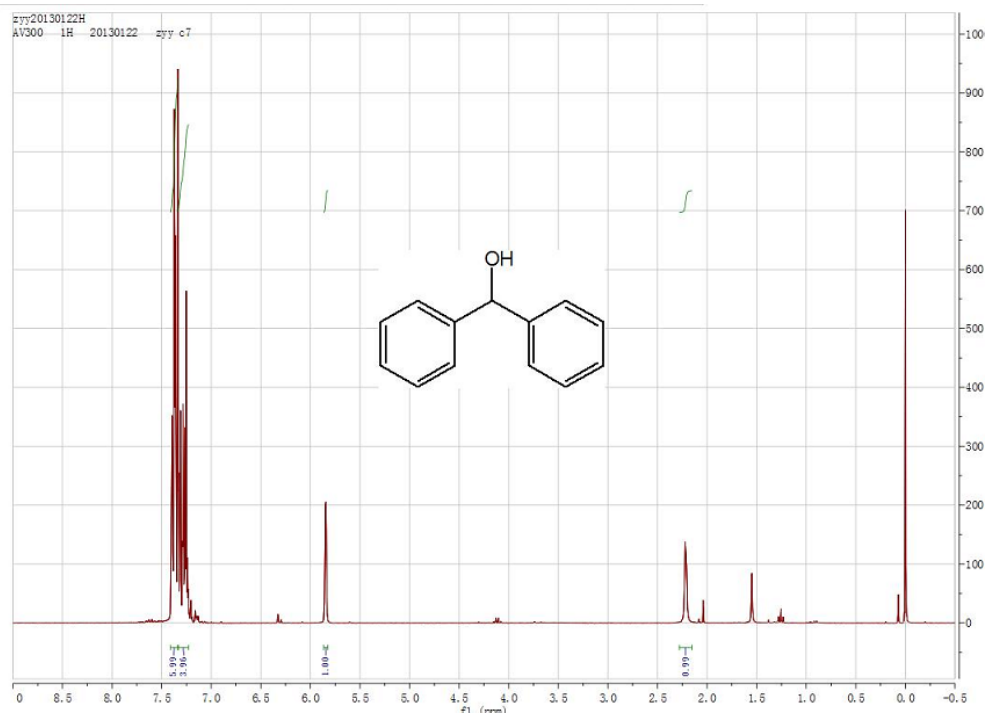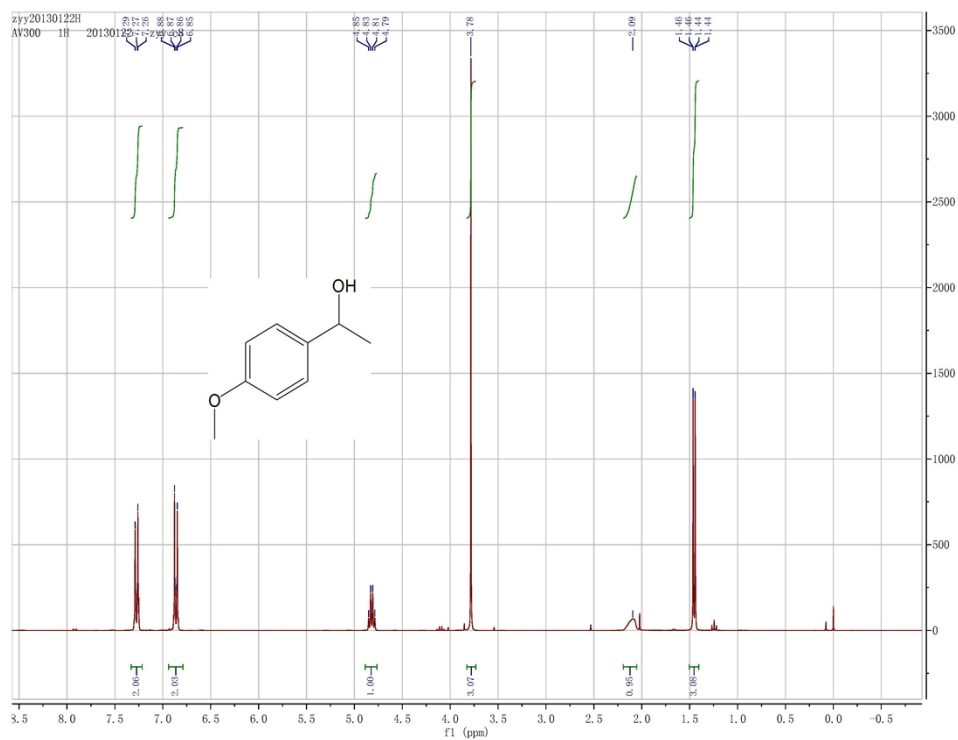

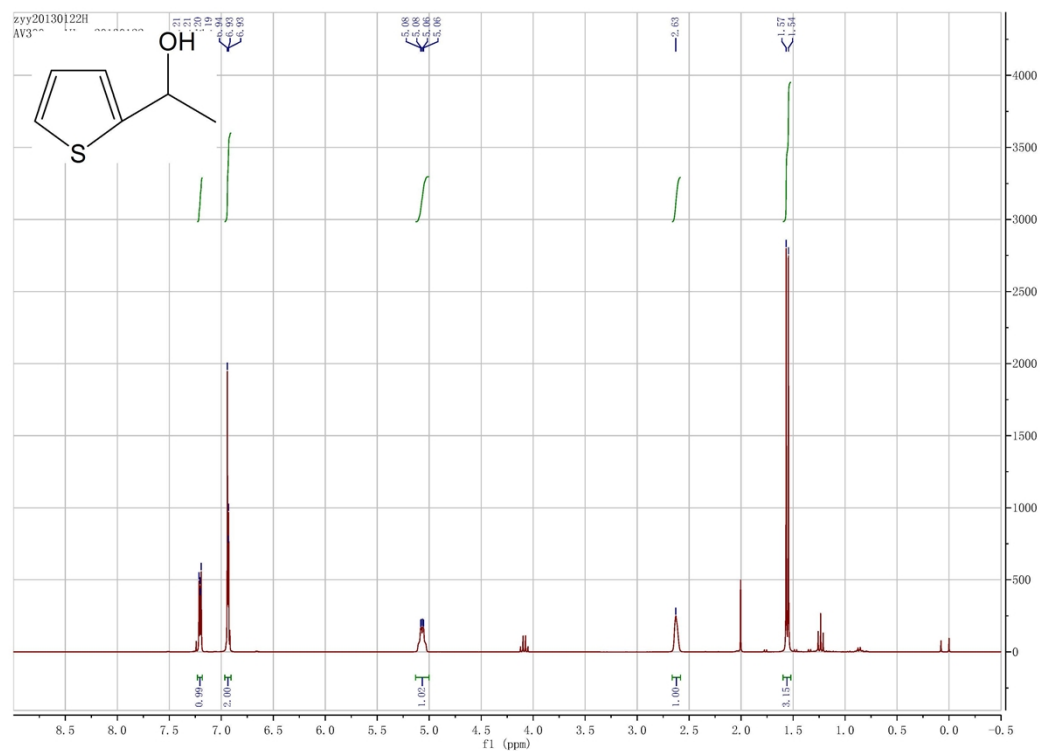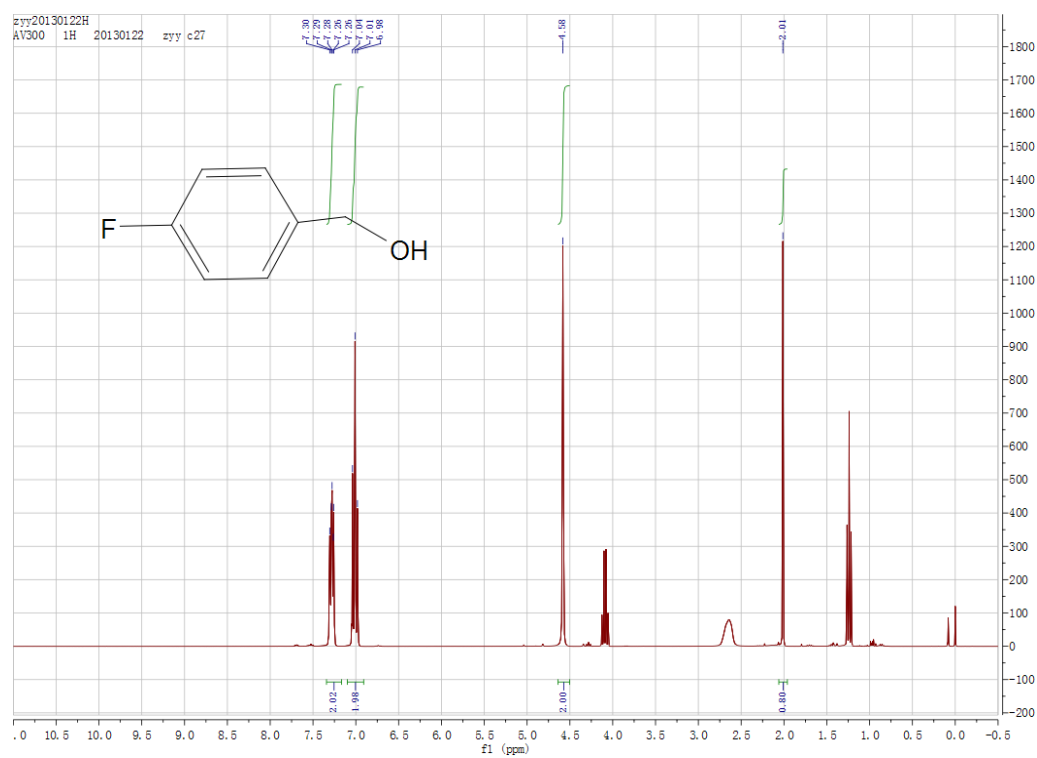

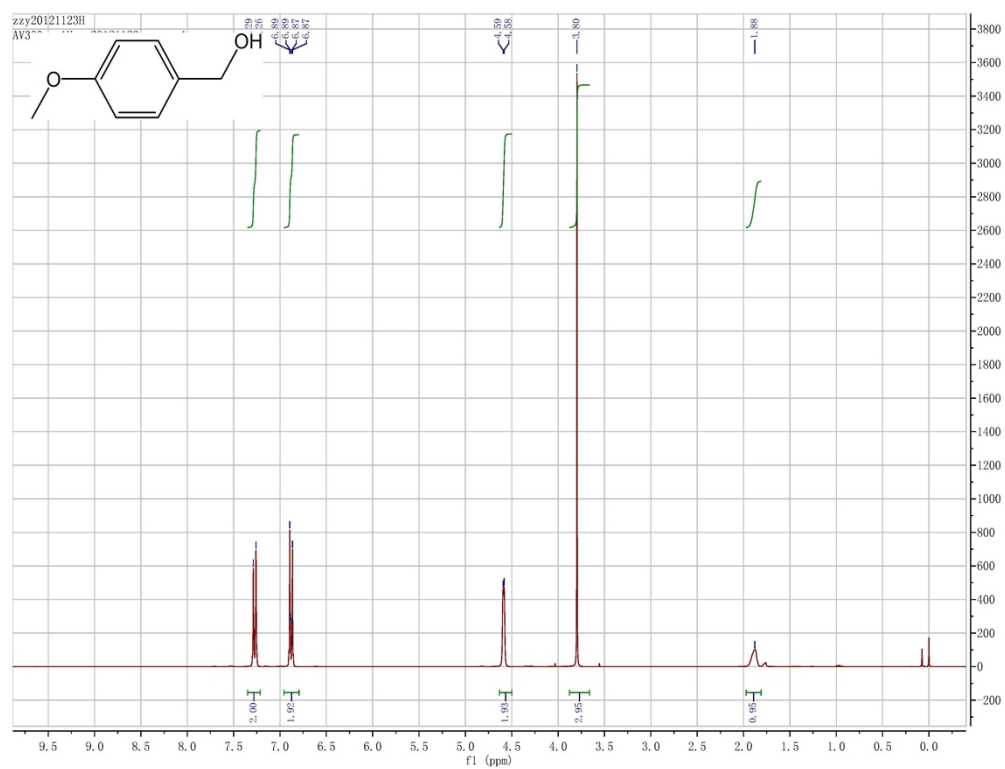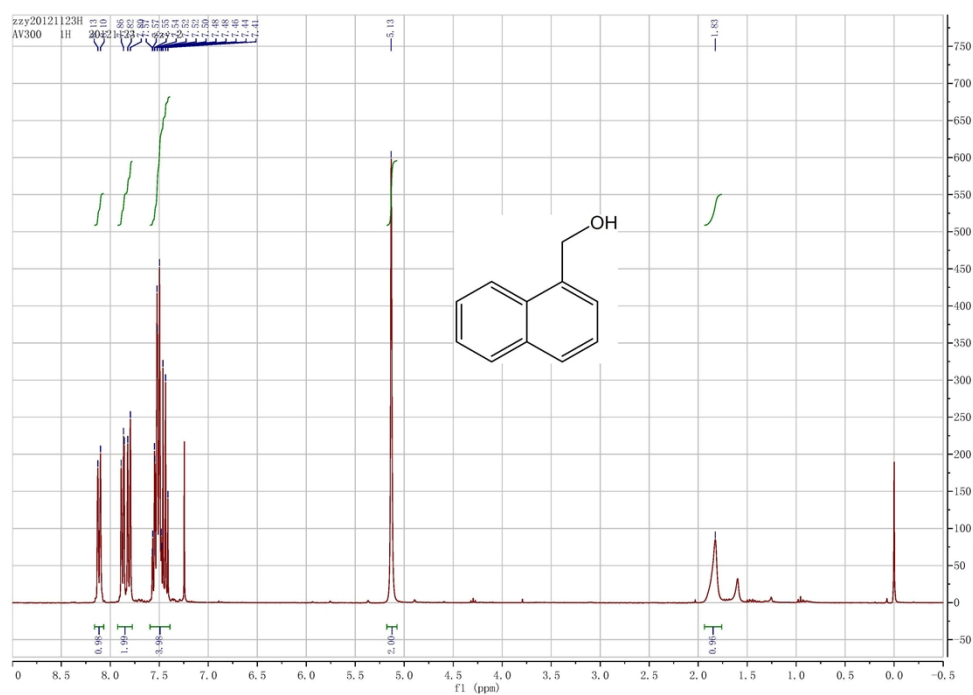

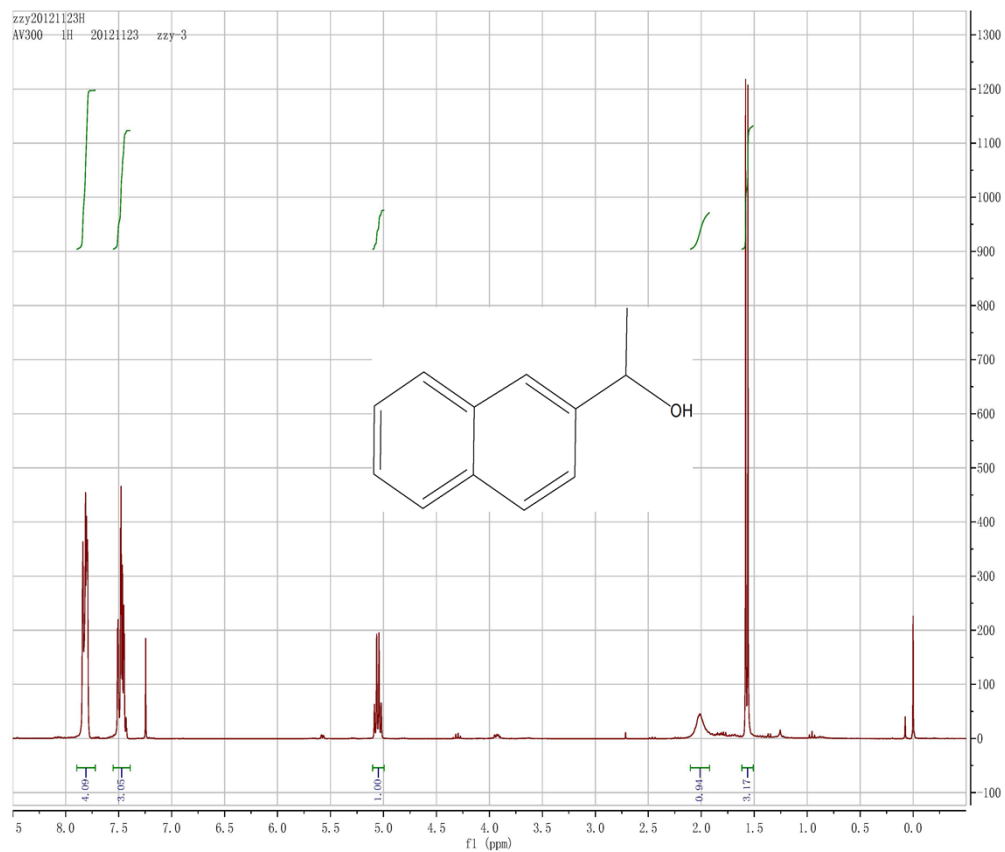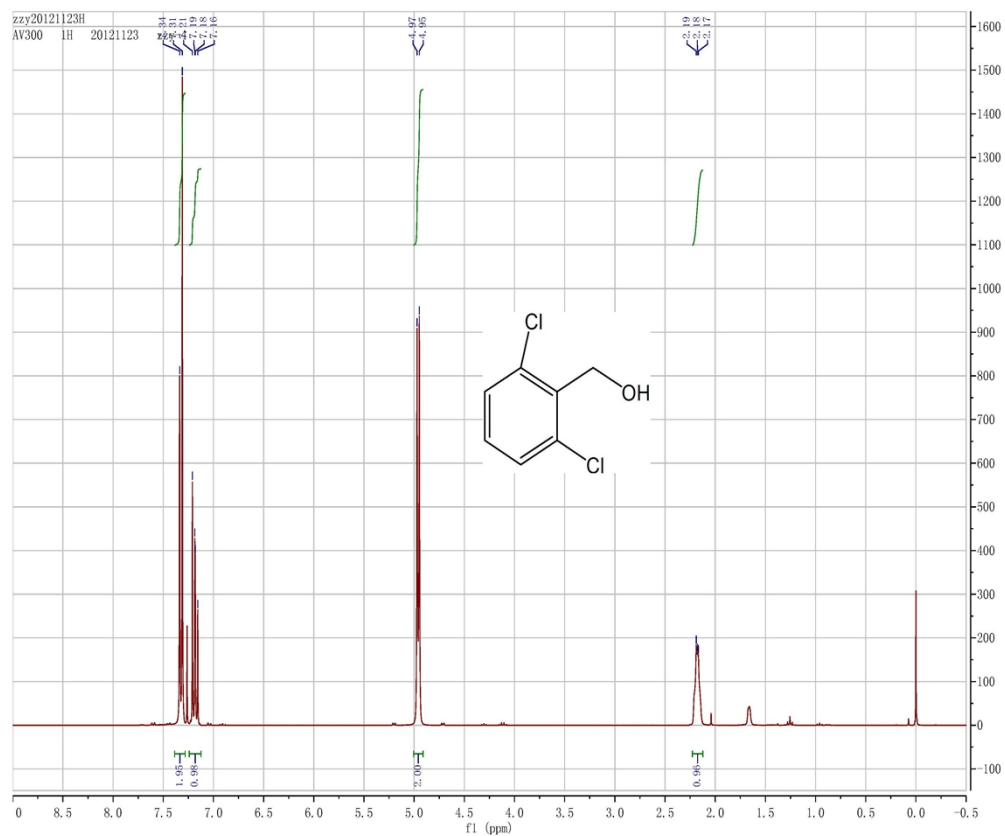



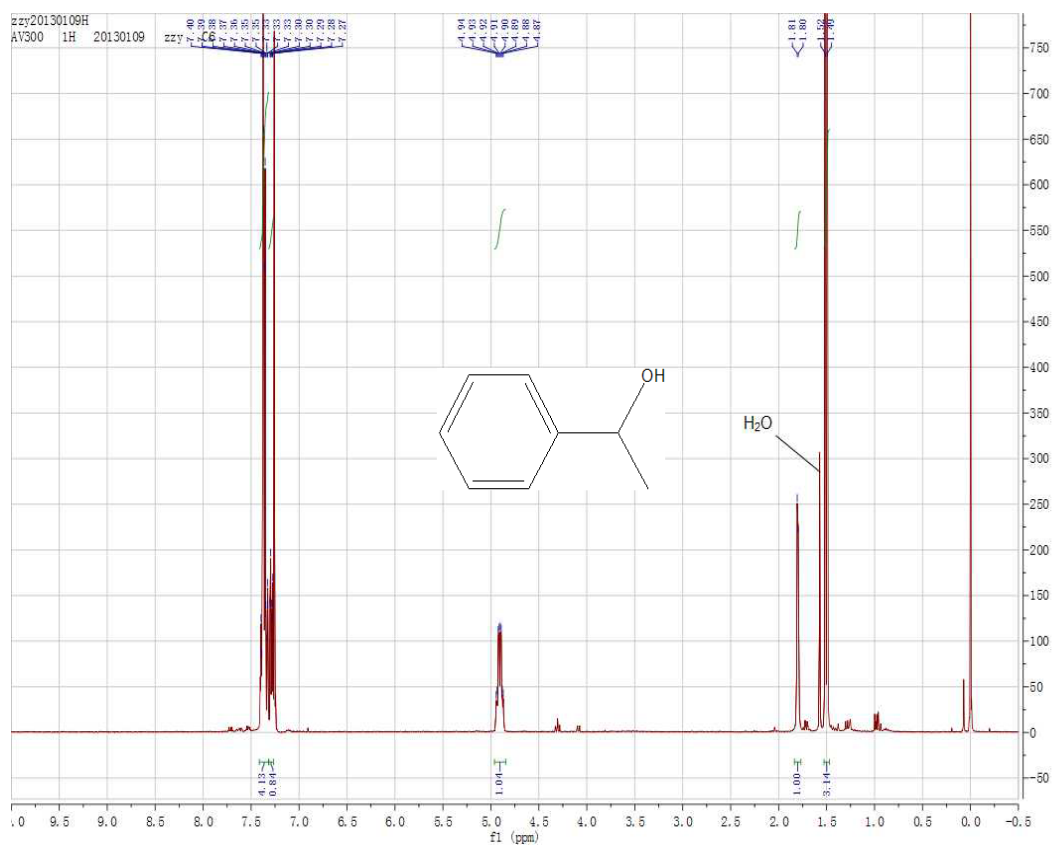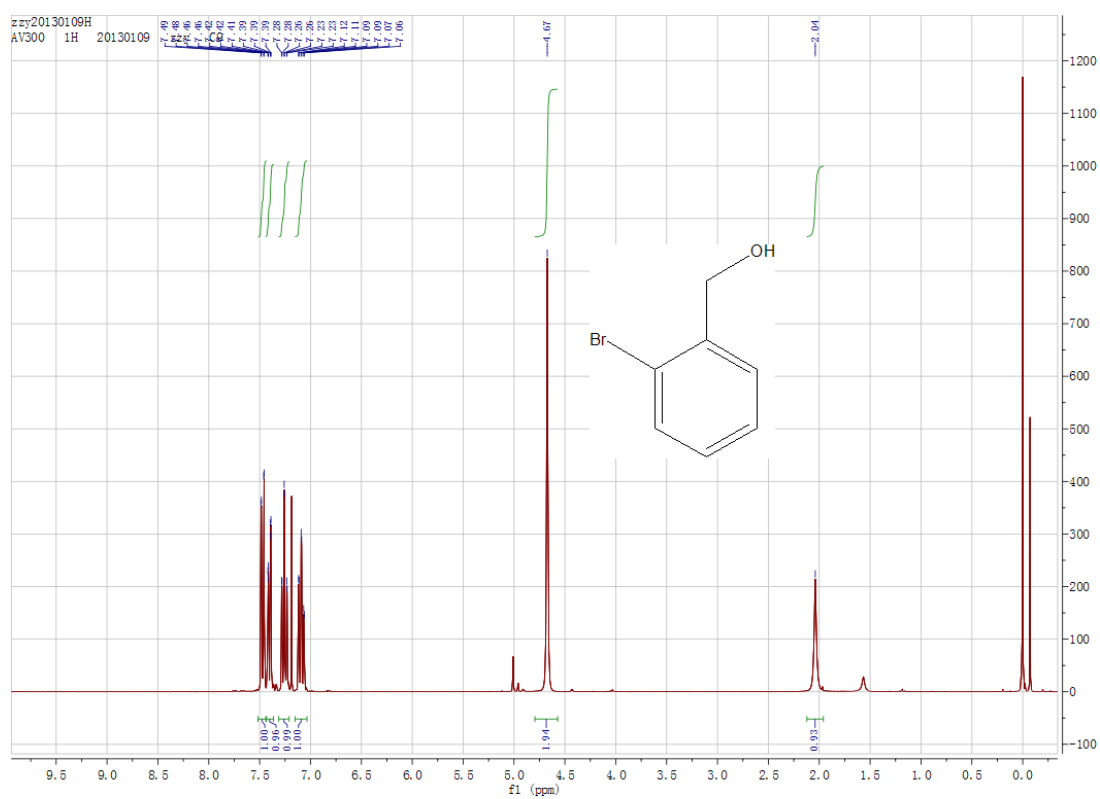

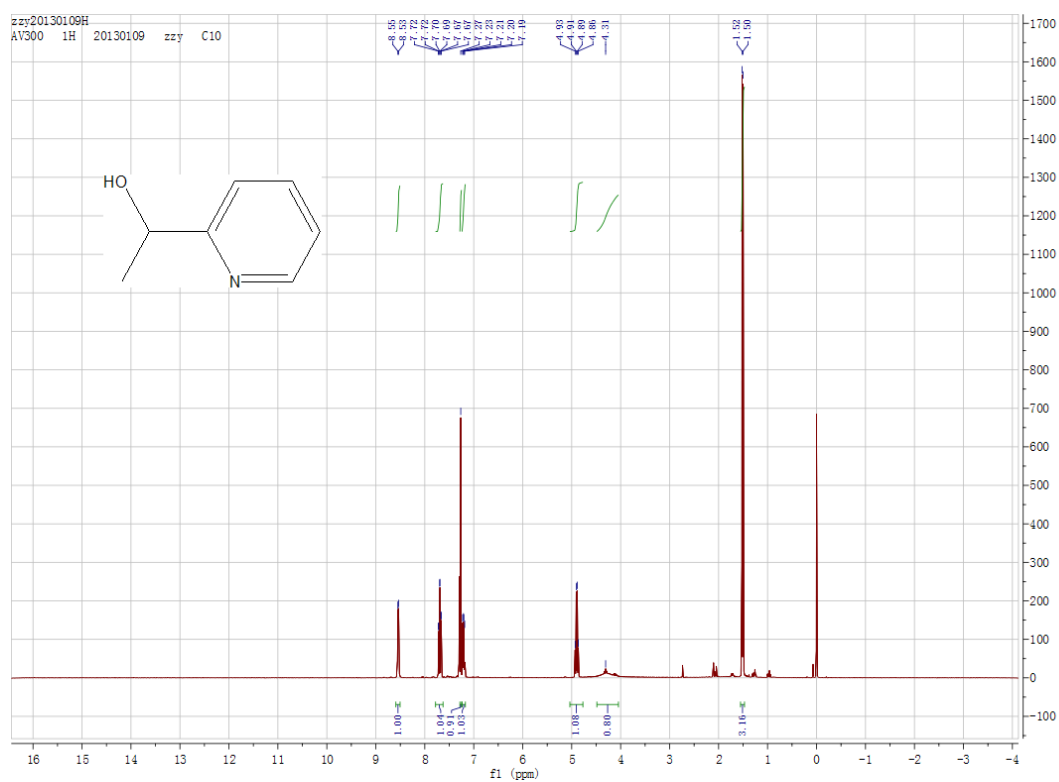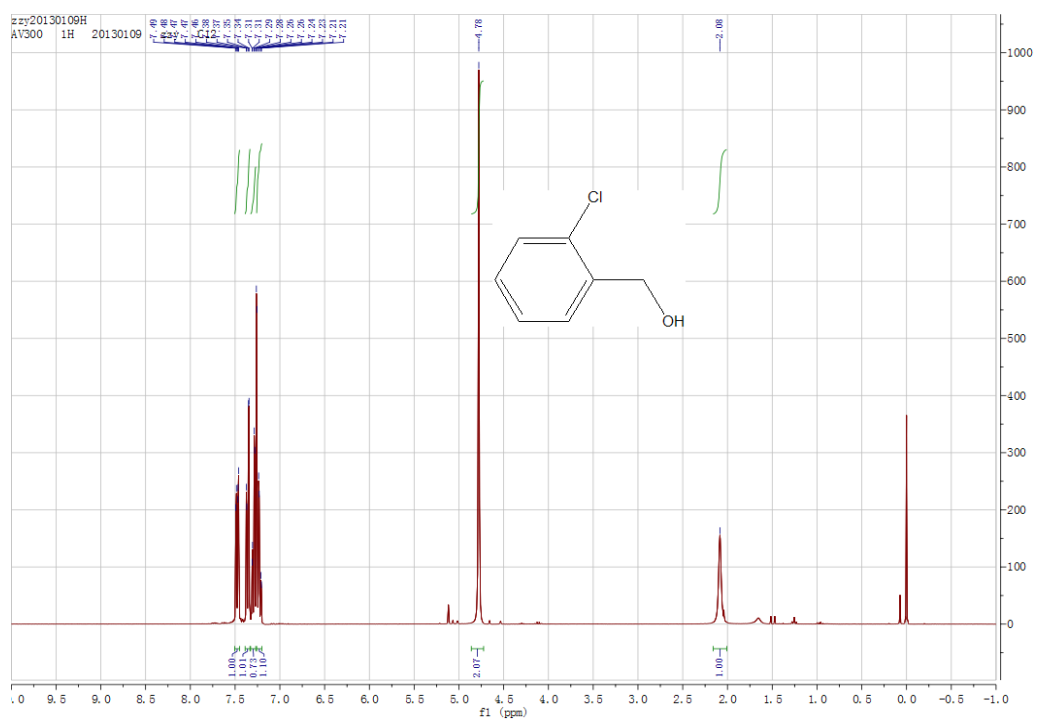

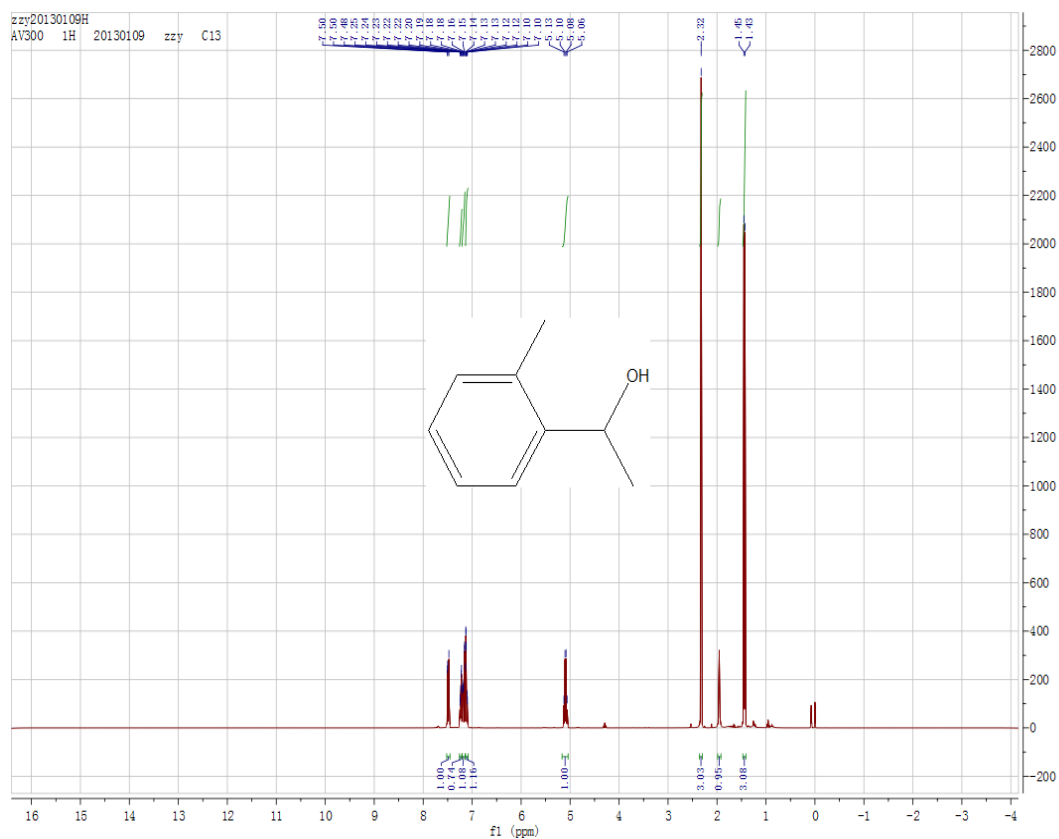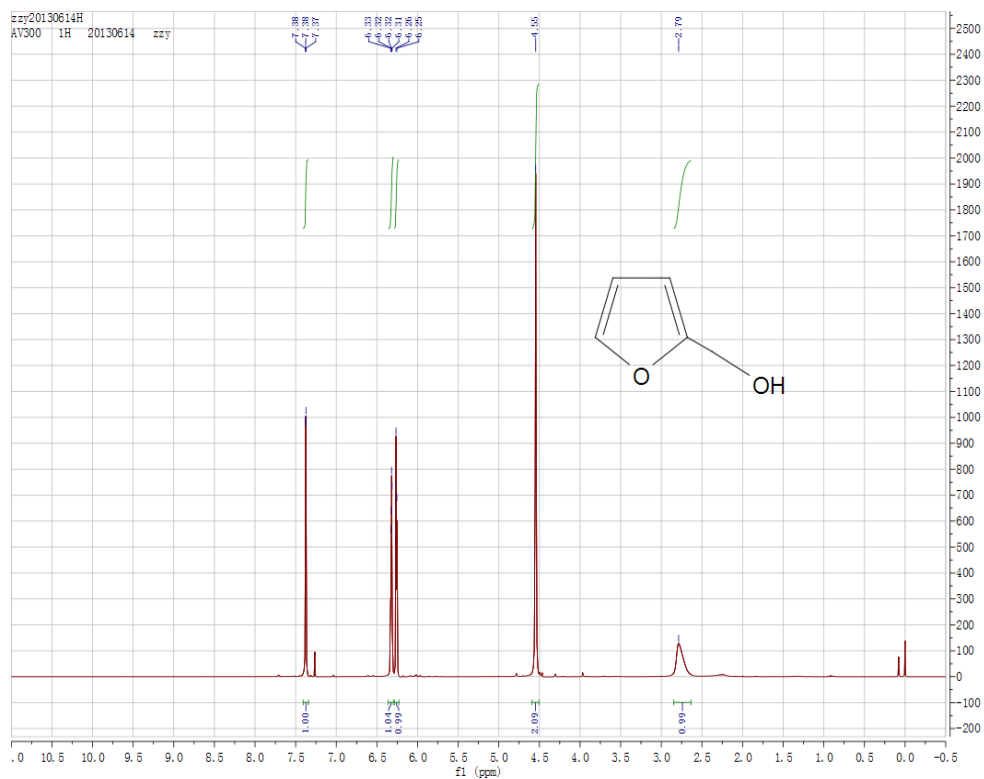

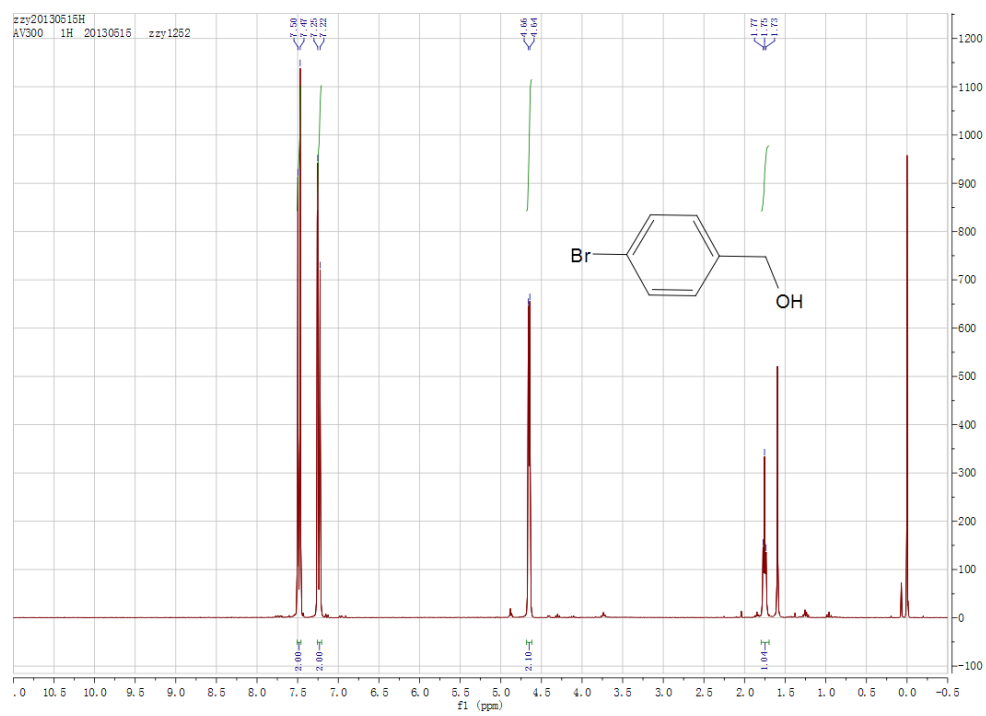

Supplement: c4dt00944d1.pdf [file c4dt00944d1.pdf]
